# Supplementary material for: Induction of crystal nucleation by orientation-controlled binding of His6-tagged proteins to functionalized gold nanoparticles
Source: Royal Society of Chemistry journal article supplement (doi:10.1039/c9ce01786k), 2020-01-01
Supplement: c9ce01786k1.pdf [file c9ce01786k1.pdf]

# Induction of crystal nucleation by orientation-controlled binding of His<sub>6</sub>-tagged proteins to functionalized gold nanoparticles

*Jiyeon Park<sup>a</sup>, Tae Ho Kang<sup>a</sup>, Inhee Choi<sup>a\*</sup>, Jungwoo Choe<sup>a\*</sup>*

<sup>a</sup>Department of Life Science, University of Seoul, Seoul 02504, Republic of Korea

\*Correspondence to: [jchoe@uos.ac.kr](mailto:jchoe@uos.ac.kr) and [inheechoi1@uos.ac.kr](mailto:inheechoi1@uos.ac.kr)

| <b>Content</b>                                                    | <b>Page</b> |
|-------------------------------------------------------------------|-------------|
| <b>Table of Contents</b>                                          | <b>S1</b>   |
| <b>Supporting Table</b>                                           |             |
| <b>Table S1.</b> Primers for cloning                              | <b>S2</b>   |
| <b>Table S2.</b> Components of MCSG 2T crystal screening solution | <b>S3</b>   |
| <b>Supplementary References</b>                                   | <b>S8</b>   |

| Primer name                                                          | Primer sequence (5'→3')                           |
|----------------------------------------------------------------------|---------------------------------------------------|
| <i>A. acidocaldarius</i><br>acetyl-CoA carboxylase ligase<br>forward | TACTTCCAATCCAATGCAATGGCCCAGGATGACACCC             |
| <i>A. acidocaldarius</i><br>acetyl-CoA carboxylase ligase<br>reverse | TTATCCACTTCCAATGTTATTAGACCTGCTCGCGCTCGGA          |
| <i>A. prevotii</i><br>nitric oxide reductase<br>forward              | TACTTCCAATCCAATGCAATGATTAATACTTACAAGAAGAA<br>A    |
| <i>A. prevotii</i><br>nitric oxide reductase<br>reverse              | TTATCCACTTCCAATGTTATTATTCATCAAATACACTTTCTCCT<br>A |

Table S1. Primers for cloning

| <b>Well</b> | <b>Solutions ( salt + buffer + precipitant )</b>                                                                              |
|-------------|-------------------------------------------------------------------------------------------------------------------------------|
| A1          | 0.2 M Potassium Sodium Tartrate 20 % (w/v) PEG 3350                                                                           |
| A2          | 0.15 M Potassium Bromide 30 % (w/v) PEG 2000 MME                                                                              |
| A3          | 0.2 M Sodium Chloride 0.1 M Na <sub>2</sub> HPO <sub>4</sub> : Citric Acid, pH 4.2 20 % (w/v) PEG 8000                        |
| A4          | 0.1 M Sodium Acetate: Acetic Acid, pH 4.5 0.8 / 1.2 M NaH <sub>2</sub> PO <sub>4</sub> /K <sub>2</sub> HPO <sub>4</sub>       |
| A5          | 0.2 M Lithium Sulfate 0.1 M CAPS: NaOH, pH 10.5 1.2 / 0.8 M NaH <sub>2</sub> PO <sub>4</sub> /K <sub>2</sub> HPO <sub>4</sub> |
| A6          | 0.1 M Sodium Cacodylate: HCl, pH 6.5 1.26 M Ammonium Sulfate                                                                  |
| A7          | 0.2 M Sodium Chloride 0.1 M Na <sub>2</sub> HPO <sub>4</sub> : Citric Acid, pH 4.2 10 % (w/v) PEG 3000                        |
| A8          | 0.2 M Potassium Formate, pH 7.3 20 % (w/v) PEG 3350                                                                           |
| A9          | 0.1 M Sodium Citrate: HCl, pH 5 20 % (w/v) PEG 6000                                                                           |
| A10         | 0.2 M Ammonium Nitrate, pH 6.3 20 % (w/v) PEG 3350                                                                            |
| A11         | 0.2 M Lithium Chloride 20 % (w/v) PEG 3350                                                                                    |
| A12         | 0.1 M Sodium Citrate: Citric Acid, pH 5.5 40 % (v/v) PEG 600                                                                  |
| B1          | 0.1 M MES: NaOH, pH 6.5 12 % (w/v) PEG 20000                                                                                  |
| B2          | 0.2 M Potassium Acetate 20 % (w/v) PEG 3350                                                                                   |
| B3          | 0.2 M Ammonium Citrate Dibasic 20 % (w/v) PEG 3350                                                                            |
| B4          | 1.8 M NaH <sub>2</sub> PO <sub>4</sub> /K <sub>2</sub> HPO <sub>4</sub> , pH 8.2                                              |
| B5          | 0.2 M Ammonium Sulfate 0.1 M Sodium Cacodylate: HCl, pH 6.5 30 % (w/v) PEG 8000                                               |
| B6          | 0.2 M Sodium Formate 20 % (w/v) PEG 3350                                                                                      |
| B7          | 0.1 M Bis-Tris Propane: HCl, pH 7 2.8 M Sodium Acetate, pH 7.0                                                                |
| B8          | 60 % (v/v) Microlytic Mix*, pH 7.0                                                                                            |
| B9          | 1 M Ammonium Sulfate 0.1 M Bis-Tris: HCl, pH 5.5 1 % (w/v) PEG 3350                                                           |
| B10         | 1.1 M Sodium Malonate, pH 7.0 0.1 M HEPES: NaOH, pH 7 0.5 % (w/v) Jeffamine ED-2001,<br>pH 7.0                                |
| B11         | 0.2 M Lithium Sulfate 0.1 M Bis-Tris: HCl, pH 6.5 25 % (w/v) PEG 3350                                                         |

B12 3 M Sodium Chloride 0.1 M Bis-Tris: HCl, pH 5.5

C1 0.8 M Succinic Acid, pH 7.0

C2 35 % (v/v) Microlytic Mix\*, pH 7.0

C3 0.2 M Ammonium Acetate 0.1 M HEPES: NaOH, pH 7.5 25 % (w/v) PEG 3350

C4 0.2 M Ammonium Citrate Tribasic, pH 7.0 20 % (w/v) PEG 3350

C5 0.2 M Sodium Citrate 20 % (w/v) PEG 3350

C6 0.1 M Bicine: NaOH, pH 9 20 % (w/v) PEG 6000

C7 0.1 M Tris: HCl, pH 8.5 1.5 M Ammonium Phosphate Dibasic

C8 0.1 M Bis-Tris Propane: HCl, pH 7 1.8 M Magnesium Sulfate

C9 0.2 M Sodium Fluoride 20 % (w/v) PEG 3350

C10 0.2 M Sodium Nitrate 20 % (w/v) PEG 3350

C11 0.1 M Bis-Tris Propane: HCl, pH 7 1.3 M Ammonium Tartrate Dibasic

C12 0.1 M Tris: HCl, pH 8.5 1.4 M Ammonium Tartrate Dibasic

D1 0.1 M Tris: HCl, pH 8.5 1.5 M Ammonium Sulfate

D2 0.2 M Lithium Sulfate 0.1 M Tris: HCl, pH 8.5 1.26 M Ammonium Sulfate

D3 0.2 M Lithium Sulfate 0.1 M CAPS: NaOH, pH 10.5 1 M Ammonium Sulfate

D4 0.2 M Calcium Acetate Hydrate 0.1 M Sodium Acetate: Acetic Acid, pH 4.5 30 % (v/v) PEG  
400

D5 0.1 M Tris: HCl, pH 8.5 3 M Sodium Chloride

D6 2.8 M Sodium Acetate: HCl, pH 7

D7 1.1 M Ammonium Tartrate Dibasic, pH 7.0

D8 0.2 M Potassium Nitrate, pH 6.9 20 % (w/v) PEG 3350

D9 1 M Lithium Chloride 0.1 M Sodium Citrate: HCl, pH 4 20 % (w/v) PEG 6000

D10 0.2 M Lithium Citrate Tribasic 20 % (w/v) PEG 3350

D11 0.1 M Tris: HCl, pH 8.5 1.5 M Lithium Sulfate

D12 0.2 M Ammonium Sulfate 20 % (w/v) PEG 3350

E1 0.1 M Bis-Tris Propane: HCl, pH 7 1.8 M Sodium Acetate, pH 7.0

E2 0.1 M Bis-Tris Propane: HCl, pH 7 3.2 M Sodium Chloride

E3 0.1 M Bis-Tris Propane: HCl, pH 7 1.5 M Lithium Sulfate

E4 1.6 M Ammonium Sulfate 0.1 M MES: NaOH, pH 6.5 10 % (v/v) Dioxane

E5 0.2 M Lithium Sulfate 0.1 M Sodium Acetate: Acetic Acid, pH 4.5 30 % (w/v) PEG 8000

E6 0.1 M Sodium Acetate: Acetic Acid, pH 4.5 1 M Ammonium Phosphate Dibasic

E7 0.2 M Lithium Sulfate 0.1 M Na<sub>2</sub>HPO<sub>4</sub>: Citric Acid, pH 4.2 20 % (w/v) PEG 1000

E8 0.1 M CHES: NaOH, pH 9.5 20 % (w/v) PEG 8000

E9 0.1 M CHES: NaOH, pH 9.5 1 M Sodium Citrate

E10 0.1 M Na<sub>2</sub>HPO<sub>4</sub>: Citric Acid, pH 4.2 1.6 / 0.4 M Na<sub>2</sub>HPO<sub>4</sub>/K<sub>2</sub>HPO<sub>4</sub>

E11 0.2 M Magnesium Chloride 0.1 M Sodium Cacodylate: HCl, pH 6.5 10 % (w/v) PEG 3000

E12 E12 0.2 M Lithium Sulfate 0.1 M Sodium Cacodylate: HCl, pH 6.5 30 % (v/v) PEG 400

F1 0.2 M Sodium Chloride 0.1 M Imidazole: HCl, pH 8 1 M Ammonium Phosphate Dibasic

F2 0.1 M Bis-Tris: HCl, pH 6.5 3 M Sodium Chloride

F3 0.1 M HEPES: NaOH, pH 7.5 3 M Sodium Chloride

F4 1 M Na<sub>2</sub>HPO<sub>4</sub>/K<sub>2</sub>HPO<sub>4</sub>, pH 6.9

F5 0.02 M Magnesium Chloride 0.1 M HEPES: NaOH, pH 7.5 22 % (w/v) Polyacrylic Acid 5100

F6 0.2 M Sodium Malonate, pH 7.0 20 % (w/v) PEG 3350

F7 0.15 M DL-Malic Acid, pH 7.0 20 % (w/v) PEG 3350

F8 0.2 M Ammonium Phosphate Monobasic 0.1 M Tris: HCl, pH 8.5 50 % (v/v) MPD

F9 0.1 M HEPES: NaOH, pH 7 10 % (w/v) PEG 6000

F10 24 % (w/v) PEG 1500, 20 % (v/v) Glycerol

F11 0.2 M Sodium Tartrate Dibasic 20 % (w/v) PEG 3350

F12 0.2 M Lithium Nitrate 20 % (w/v) PEG 3350

G1 0.2 M Sodium Phosphate Dibasic 20 % (w/v) PEG 3350

G2 0.1 M Tris: HCl, pH 8.5 2.4 M Ammonium Phosphate Dibasic

- G3 0.2 M Sodium Chloride 0.1 M Imidazole: HCl, pH 8 0.4 / 1.6 M NaH<sub>2</sub>PO<sub>4</sub>/K<sub>2</sub>HPO<sub>4</sub>
- G4 0.2 M Calcium Acetate Hydrate 0.1 M MES: NaOH, pH 6 10 % (w/v) Isopropanol
- G5 0.2 M Sodium Chloride 0.1 M CHES: NaOH, pH 9.5 1.26 M Ammonium Sulfate
- G6 0.2 M Sodium Chloride 0.1 M Sodium Citrate: Citric Acid, pH 5.5 1 M Ammonium Phosphate  
Dibasic
- G7 0.1 M Tris: HCl, pH 7 15 % (w/v) Ethanol
- G8 0.1 M Tris: HCl, pH 7 20 % (w/v) PEG 1000
- G9 0.2 M Sodium Chloride 0.1 M Na<sub>2</sub>HPO<sub>4</sub>/KH<sub>2</sub>PO<sub>4</sub>, pH 6.2 20 % (w/v) PEG 1000
- G10 0.2 M Sodium Chloride 0.1 M CAPS: NaOH, pH 10.5 20 % (w/v) PEG 8000
- G11 0.1 M HEPES: NaOH, pH 7 30 % (v/v) Jeffamine ED-2001, pH 7.0
- G12 0.2 M Calcium Chloride 0.1 M Bis-Tris: HCl, pH 5.5 45 % (v/v) MPD
- H1 0.2 M Calcium Chloride 0.1 M Bis-Tris: HCl, pH 6.5 45 % (v/v) MPD
- H2 0.2 M Potassium Chloride 0.05 M HEPES: NaOH, pH 7.5 35 % (v/v) Pentaerythritol  
Propoxylate 5/4 PO/OH
- H3 0.2 M Trimethylamine N-Oxide 0.1 M Tris: HCl, pH 8.5 20 % (w/v) PEG 2000 MME
- H4 0.2 M Ammonium Acetate 0.1 M Tris: HCl, pH 8.5 25 % (w/v) PEG 3350
- H5 0.1 M Succinic Acid, pH 7.0 15 % (w/v) PEG 3350
- H6 0.1 M Sodium Citrate: HCl, pH 4 0.8 M Ammonium Sulfate
- H7 0.1 M Bicine: NaOH, pH 9 10 % (w/v) PEG 20000, 2 % (v/v) Dioxane
- H8 0.2 M Magnesium Chloride 0.1 M HEPES: NaOH, pH 7.5 30 % (v/v) PEG 400
- H9 0.1 M Sodium Acetate: HCl, pH 4.6 2.5 M Ammonium Sulfate
- H10 0.2 M Sodium Chloride 20 % (w/v) PEG 3350
- H11 0.1 M Tris: HCl, pH 8.5 2.5 M Ammonium Sulfate
- H12 0.2 M Zinc Acetate 0.1 M Sodium Acetate: Acetic Acid, pH 4.5 10 % (w/v) PEG 3000

---

\*(1)Microlytic Mix is comprised of 1.8305 M Malonic Acid, 0.25 M Ammonium Citrate Tribasic, 0.12

M Succinic Acid, 0.3 M DL-Malic Acid, 0.4 M Sodium Acetate Trihydrate, 0.5 M Sodium Formate,

0.16 M Ammonium Tartrate Dibasic. Microlytic Mix at pH 7.0 is titrated with HCl. This mix is available from Anatrace, Product Nos. OPTIMIZE-131 and OPTIMIZE-132.<sup>1</sup>

**Table S2.** Components of MCSG 2T crystal screening solution. MCSG 2T crystallization suite has 96 solutions. All 96 conditions have a different constituent of salt, buffer, and precipitant.

## Supplementary References

1. A. McPherson and B. Cudney, *Journal of structural biology*, 2006, **156**, 387-406.
